# Supplementary material
Source: Springer Nature journal article supplement (https://www.springermedizin.de/resource/supplementary/13058_2011_2921_MOESM8_ESM.pdf/9702836)

**A****ER $\alpha$** **DAPI****NMuMG**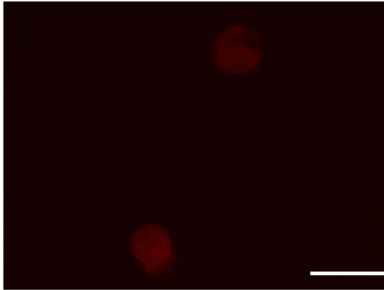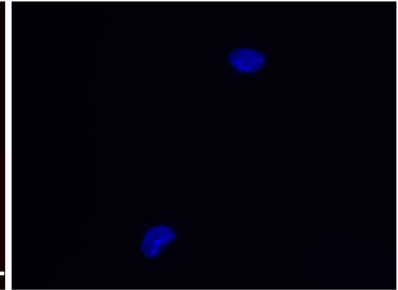**SSM1**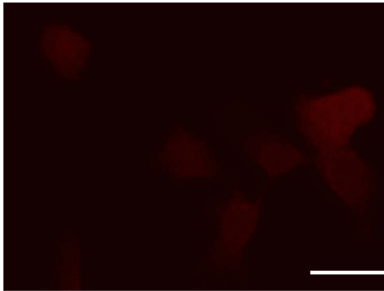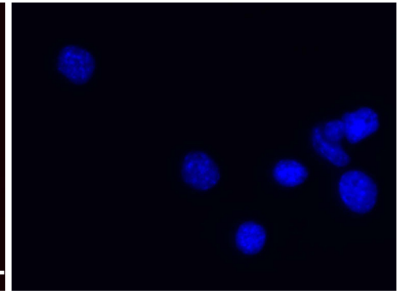**SSM2**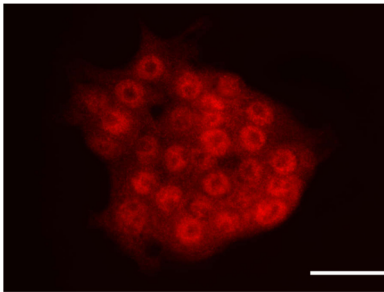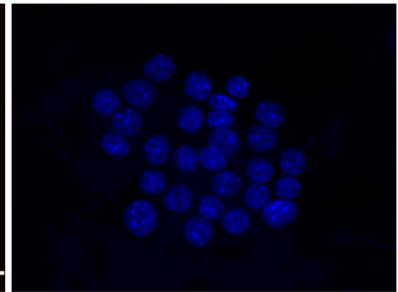**SSM3**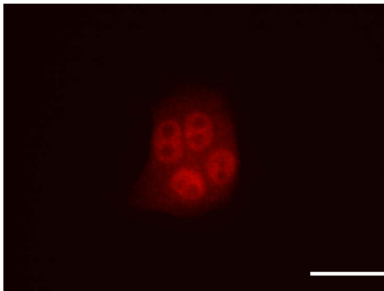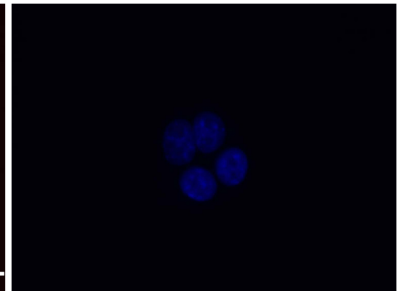**MCF7**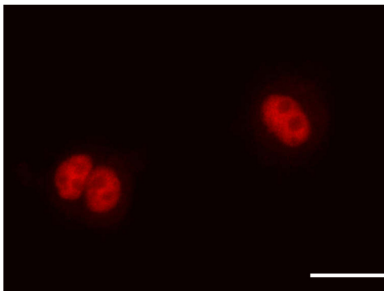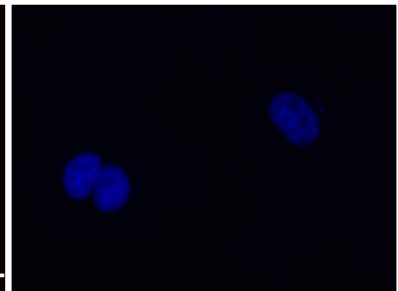**B**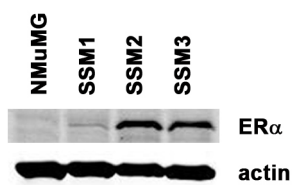**C**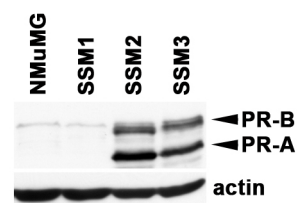

Supplement: MOESM8 [file 9702836]
